# Supplementary material for: SNP4OrphanSpecies: A bioinformatics pipeline to isolate molecular markers for studying genetic diversity of orphan species
Source: PubMed Central journal article supplement (PMC9848450; doi:10.3897/bdj.10.e85587), 2022-08-24
Supplement: bdj-10-e85587-s002.pdf [file bdj-10-e85587-s002.pdf]

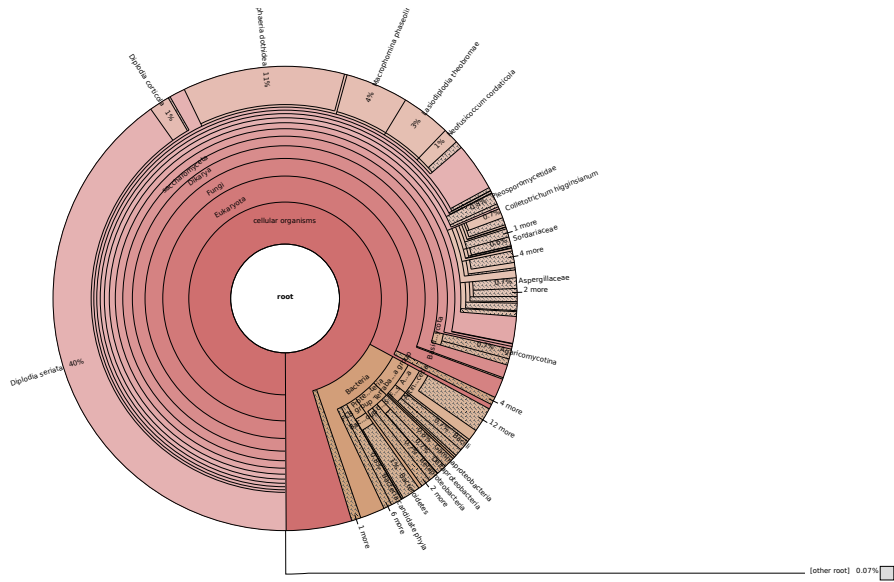

S1a : Proportion of the Diplodia genome assembly assigned to different taxa using Kaiju

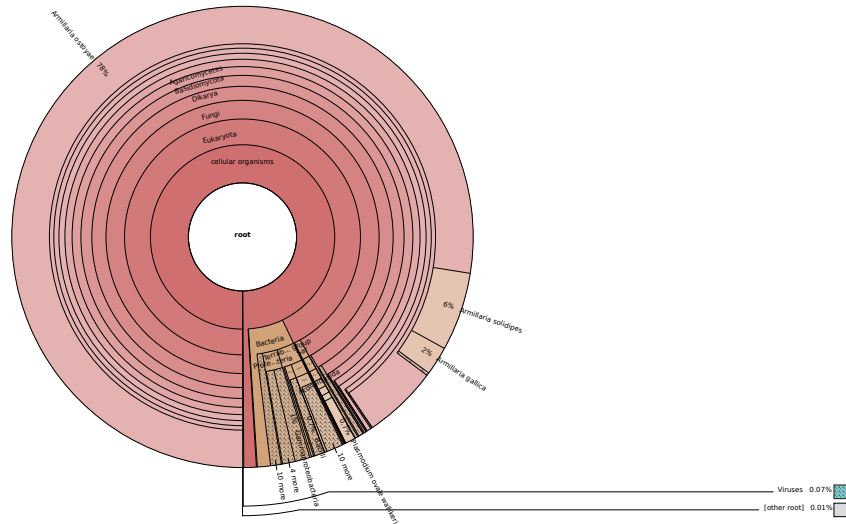

S1b : Proportion of the Armillaria genome assembly assigned to different taxa using Kaiju

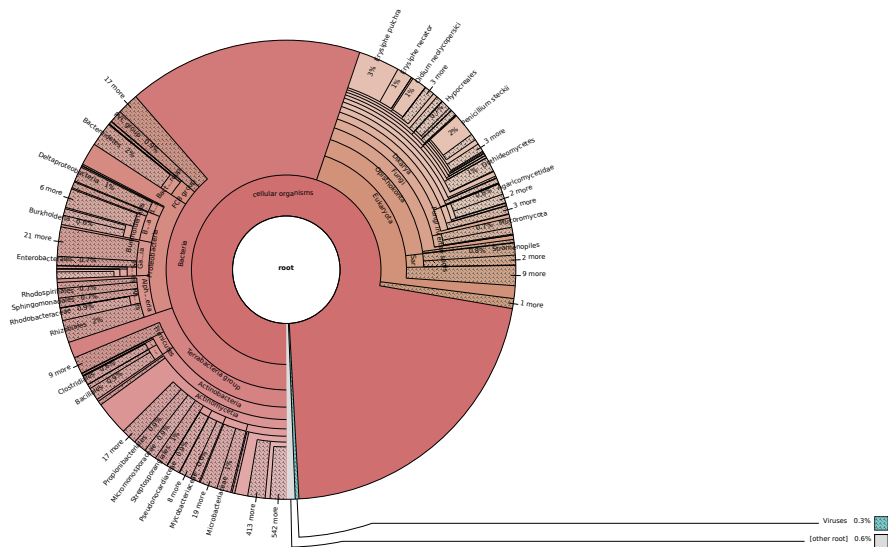

S1c : Proportion of the Erysiphe genome assembly assigned to different taxa using Kaiju
